# Supplementary material for: Polymethyl(1–Butyric acidyl)silane–Assisted Dispersion and Density Gradient Ultracentrifugation Separation of Single–Walled Carbon Nanotubes
Source: MDPI journal article supplement (doi:10.3390/nano12122094), 2022-06-17
Supplement: s1 [file s1]

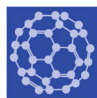

Supporting Information for:

# Polymethyl(1-Butyric acidyl)silane-Assisted Dispersion and Density Gradient Ultracentrifugation Separation of Single-Walled Carbon Nanotubes

Hongming Liu <sup>1</sup>, Qin Zhou <sup>1,\*</sup> and Yongfu Lian <sup>1,\*</sup>

<sup>1</sup> Key Laboratory of Functional Inorganic Material Chemistry, Ministry of Education, School of Chemistry and Materials Science, Heilongjiang University, Harbin 150080, China, 2191007@s.hlj.u.edu.cn

\* Correspondence: zhouqin@hlju.edu.cn (Q.Z.); chyflian@hlju.edu.cn (Y.L.)

## 1. Figures

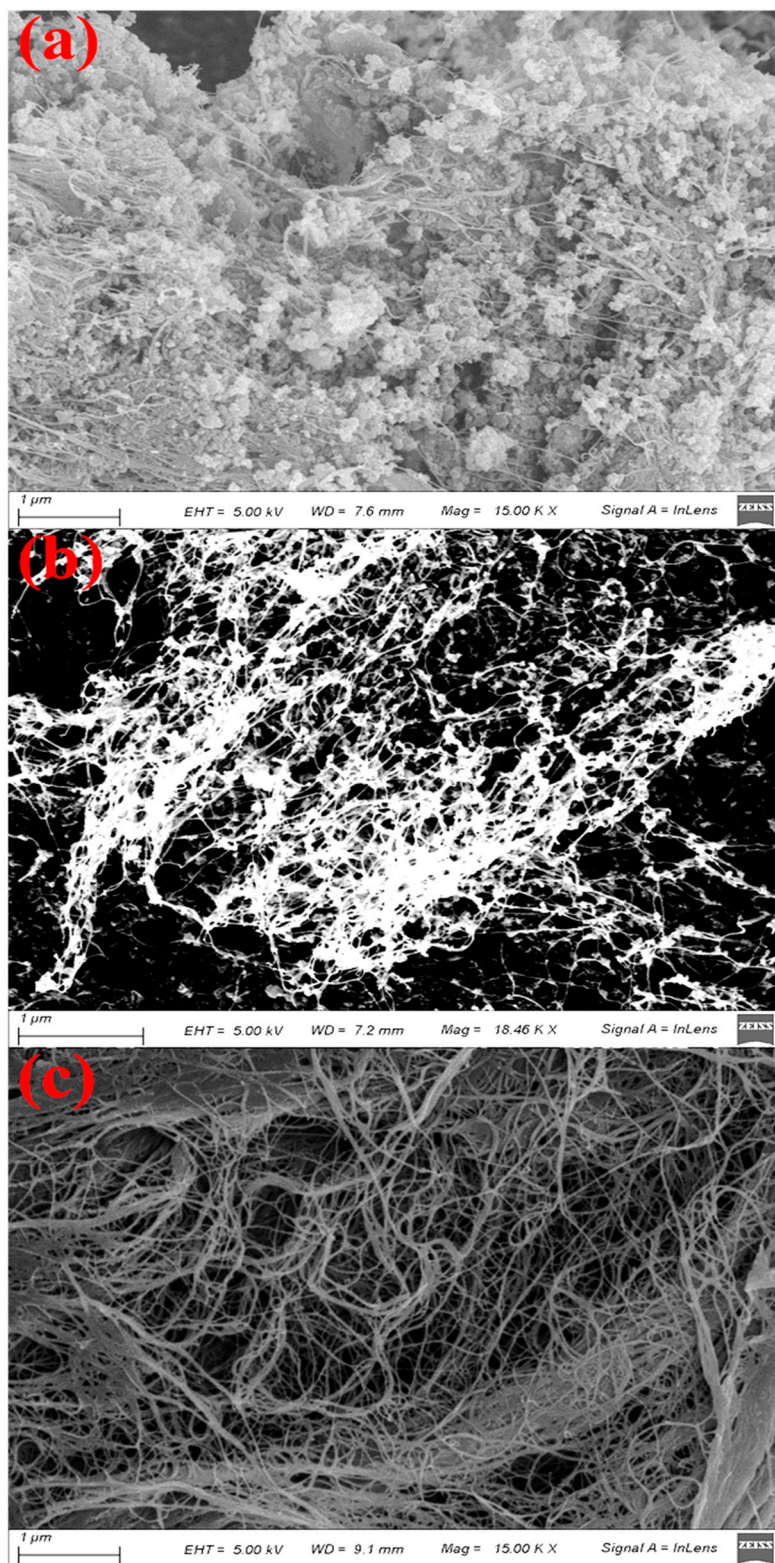

**Figure S1.** SEM images of (a) as-prepared SWNTs, (b) heat-treated SWNTs, and (c) primarily purified SWNTs, respectively.

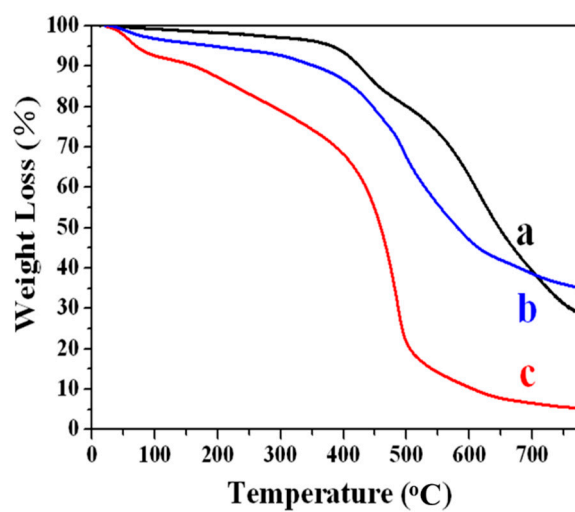

**Figure S2.** TG analysis of (a) as-prepared SWNTs, (b) heat-treated SWNTs, and (c) primarily purified SWNTs, respectively.

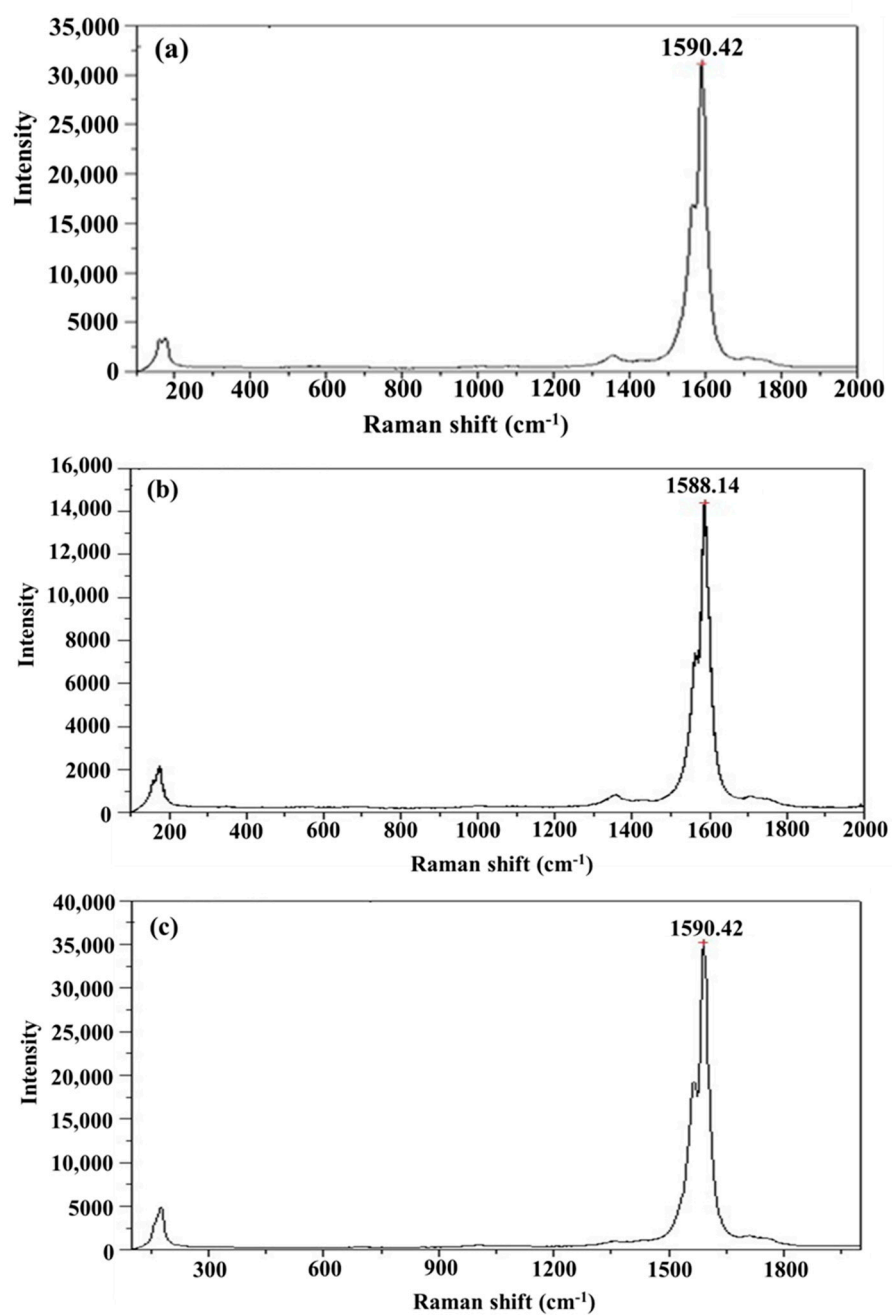

**Figure S3.** Raman spectra of (a) as-prepared SWNTs, (b) heat-treated SWNTs, and (c) primarily purified SWNTs, respectively.

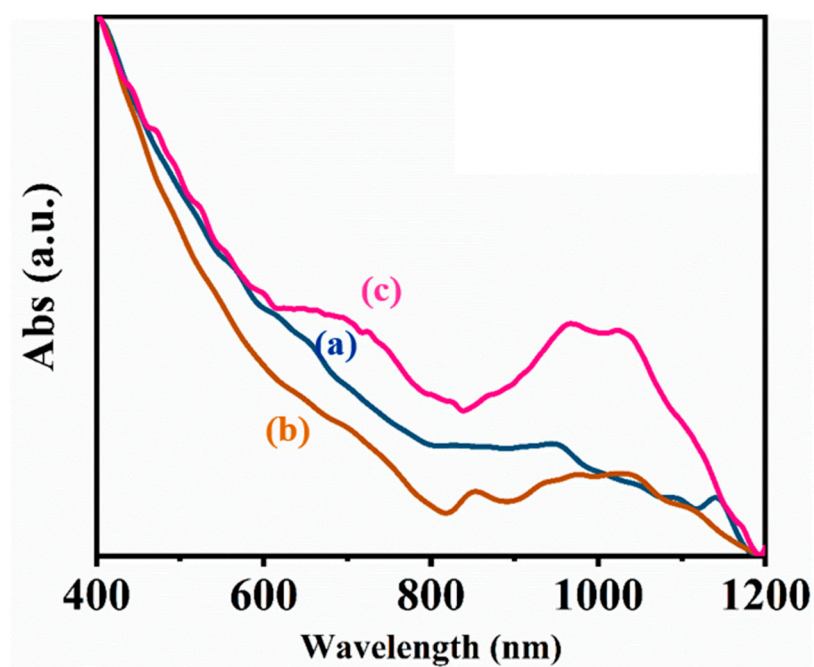

**Figure S4.** Vis-NIR spectra of (a) as-prepared SWNTs, (b) heat-treated SWNTs, and (c) primarily purified SWNTs, respectively.

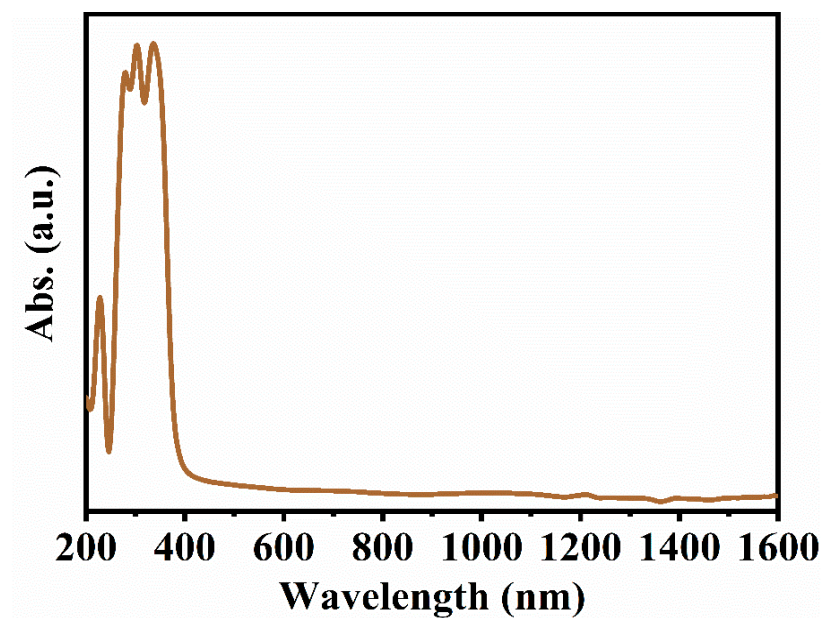

**Figure S5.** UV-Vis-NIR spectrum of water-soluble BA-PMS.



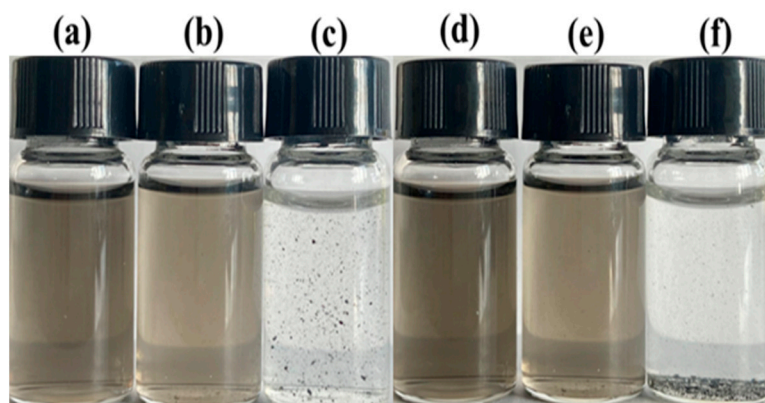

**Figure S6.** photographs of (a) SWNTs dispersed BA-PMS, (b) the aqueous solution of DOC, and (c) SWNTs dispersed in water. (d), (e) and (f) are taken after (a), (b) and (c) setting for 90 days, respectively.

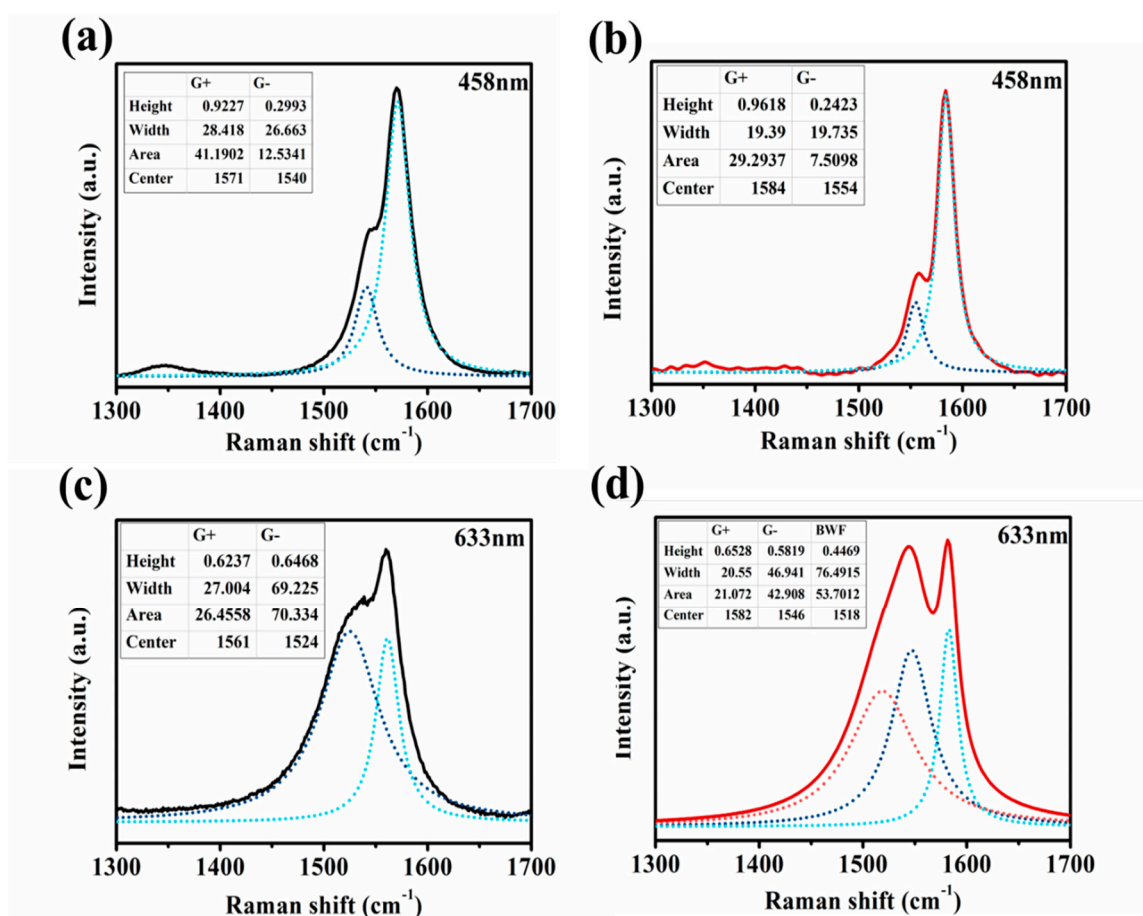

**Figure S7.** Lorentz-fitted curves of G-bands of primarily purified SWNTs (black lines) and BA-PMS-dispersed SWNTs (red lines) at (a,b) 458 and (c,d) 633 nm excitation wavelengths, respectively.

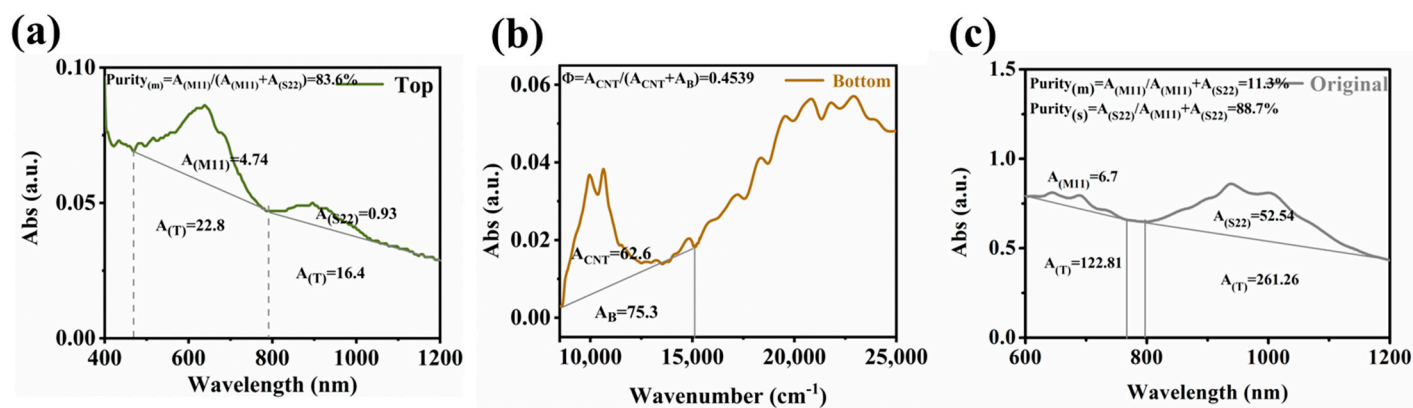

Figure S8. Purity calculation on the vis-NIR absorption spectra of (a) top green layer, (b) bottom red-brown layer, and (c) original SWNTs.

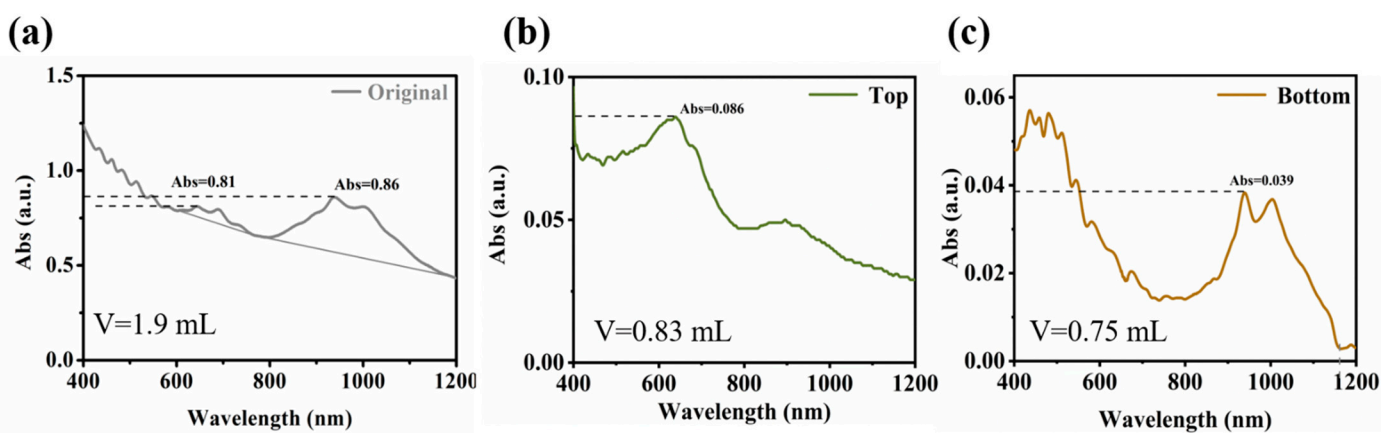

Figure S9. The absorption spectra of (a) SWNTs dispersion before DGU separation, DGU separated (b) m-SWNTs and (c) sc-SWNTs dispersions.

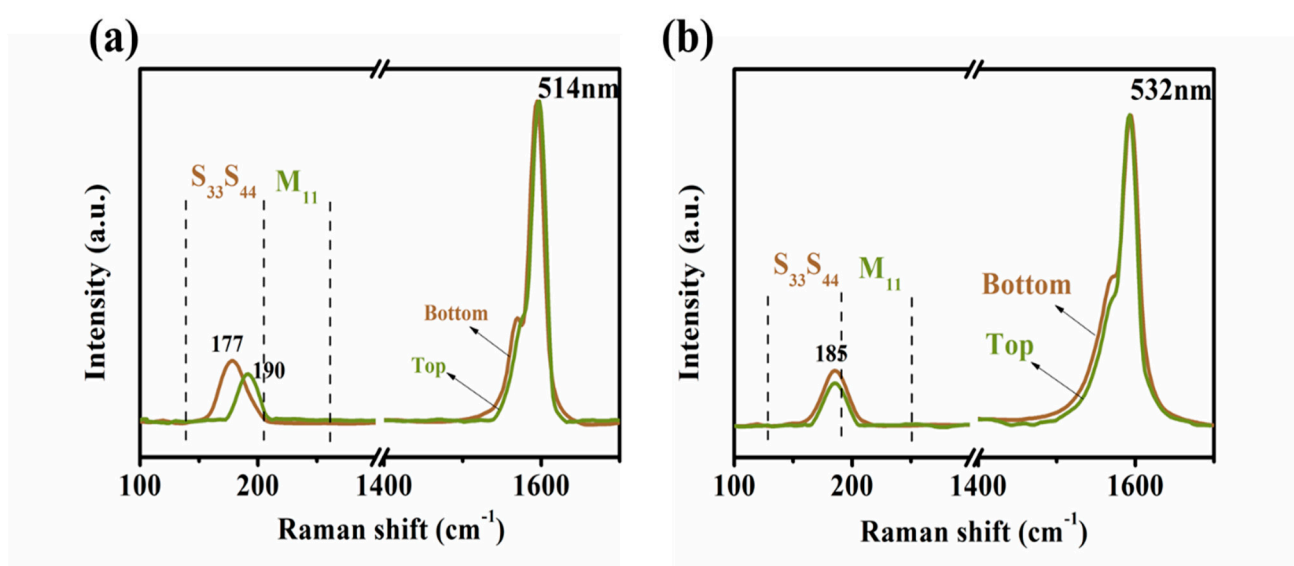

Figure S10. Raman spectra of the SWNTs in the top green layer and the bottom red-brown layer at the excitation of (a) 514 and (b) 532 nm, respectively, in the ranges of 100-1700  $cm^{-1}$ .

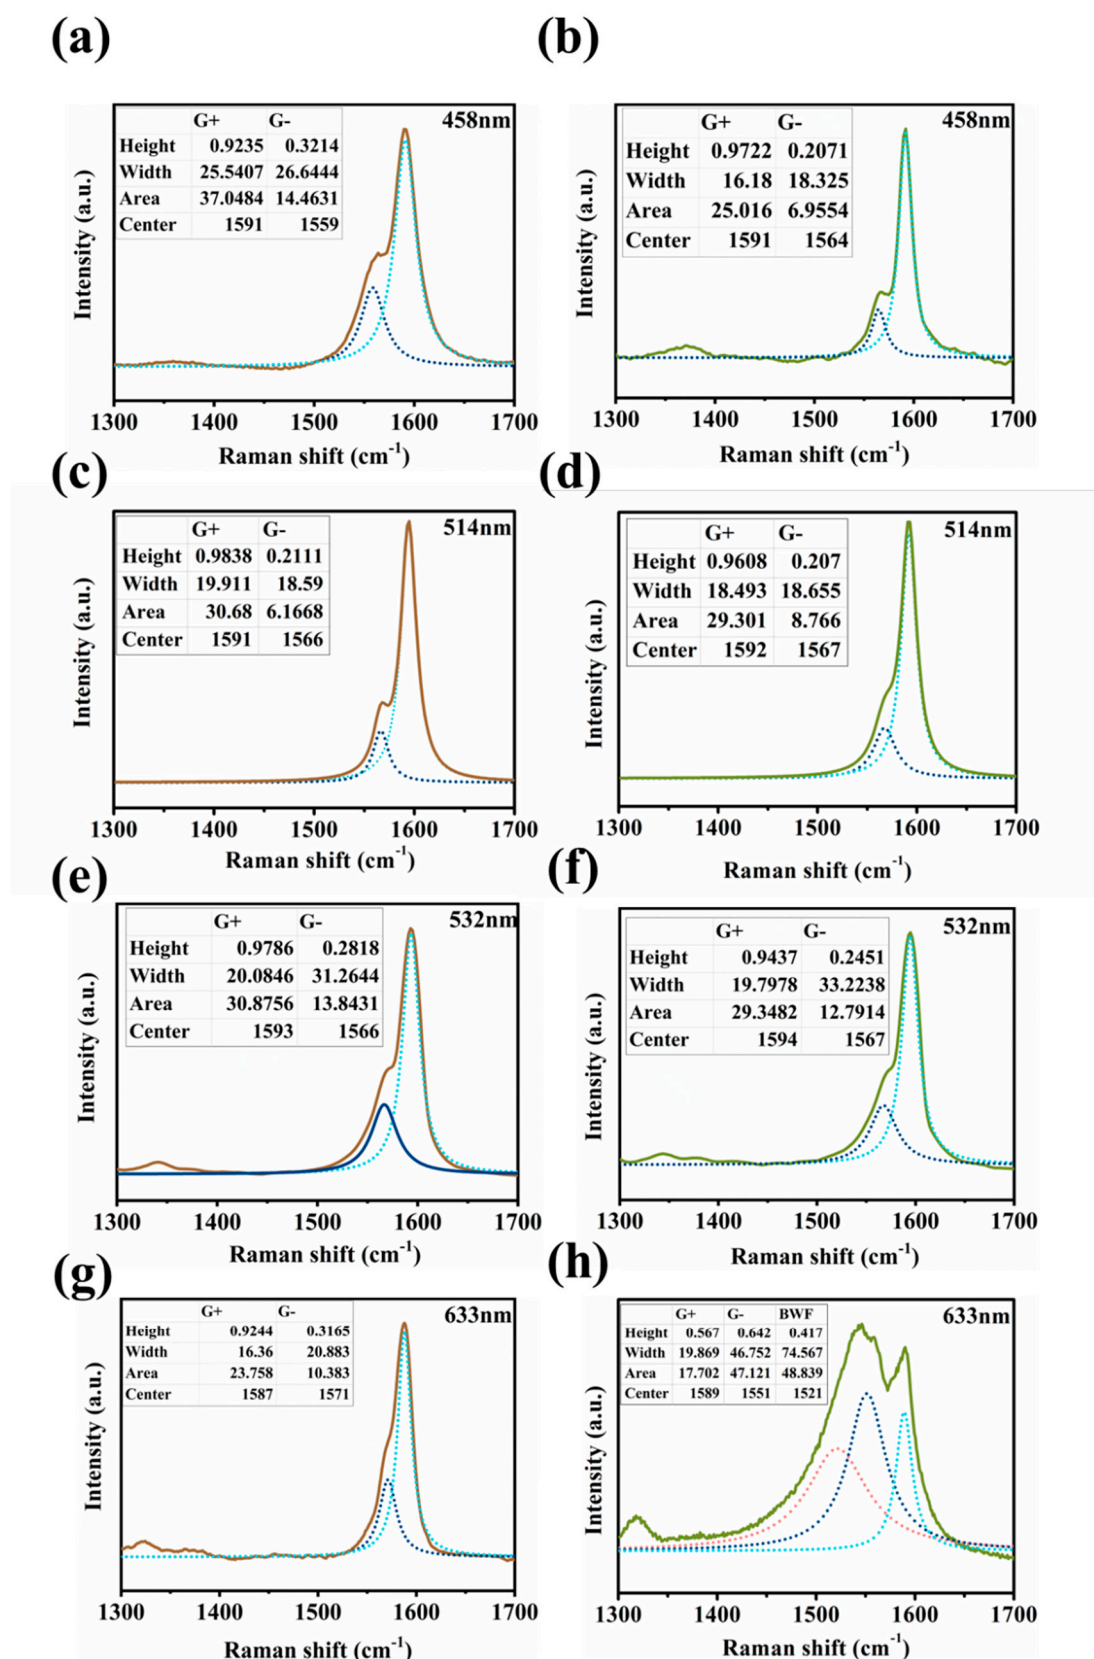

**Figure S11.** Lorentz-fitted curves of G-bands of the bottom red-brown layer (brown lines) and top green layer (green lines) at (a-b) 458, (c-d) 514, (e-f) 532, and (h-g) 633 nm excitation wavelengths, respectively.



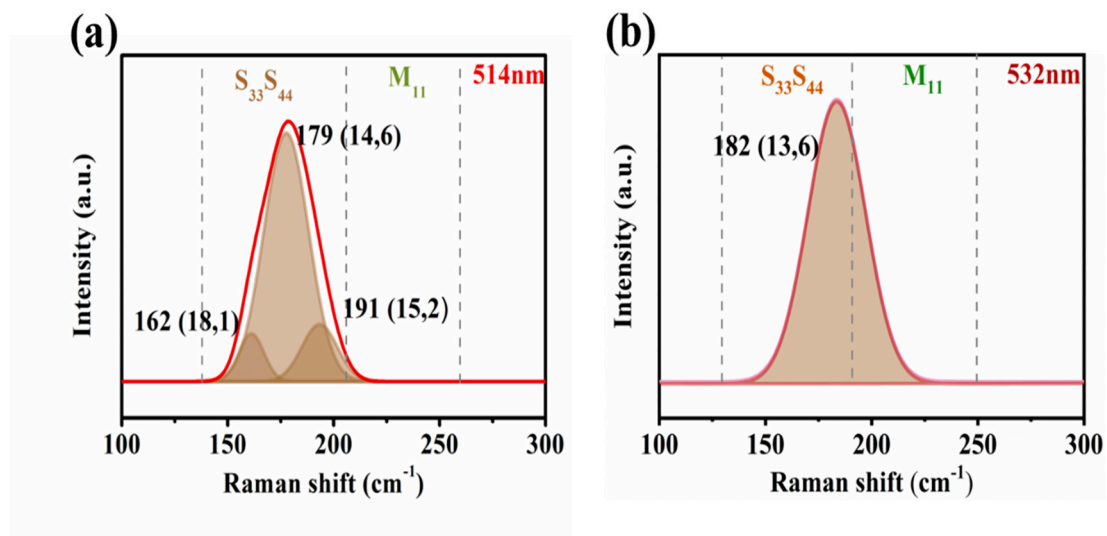

**Figure S12.** Raman spectra of the BA-PMS-dispersed-SWNTs at the excitations of (a) 514 and (b) 532 nm, respectively, in the range of 100–300  $\text{cm}^{-1}$ .

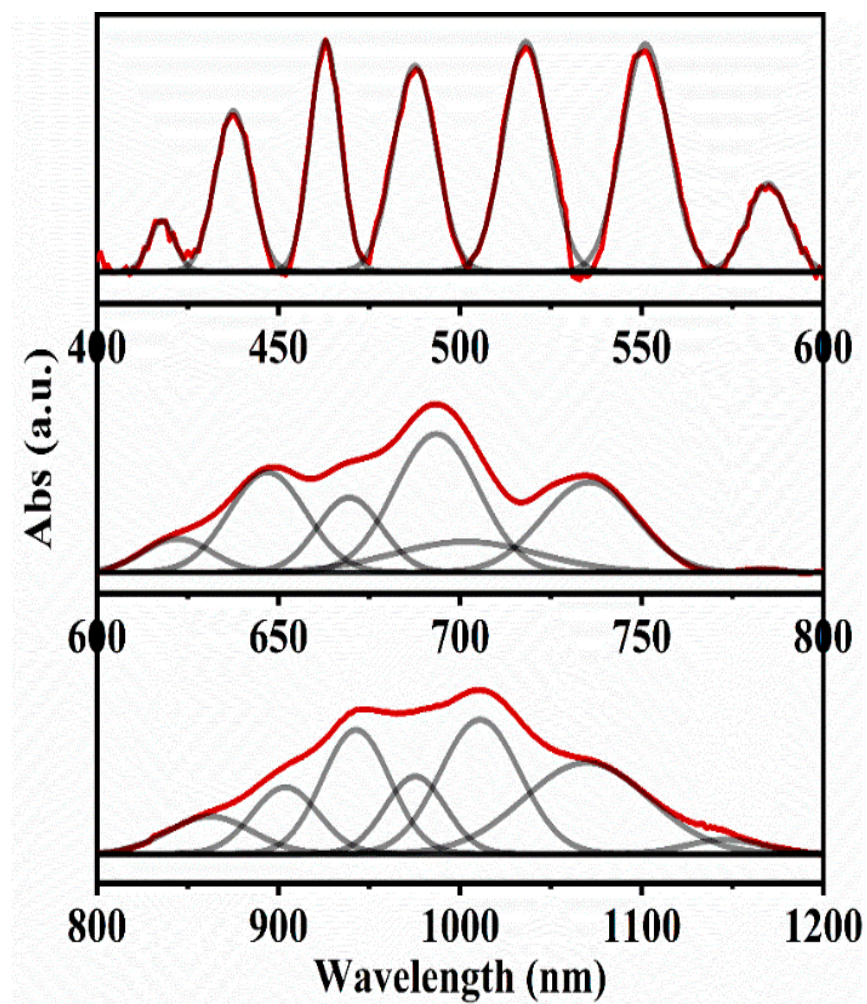

**Figure S13.** Gaussian fit curves of Vis-NIR absorption spectra of BA-PMS-dispersed SWNTs.

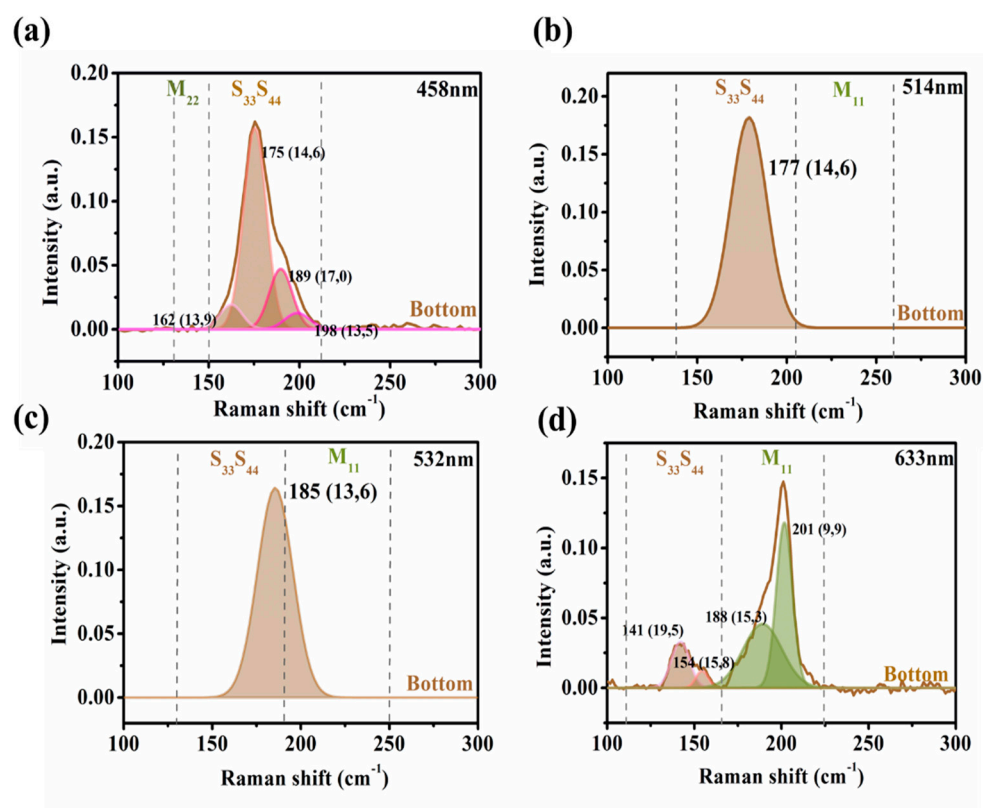

Figure S14. Gaussian fitting curves for the bottom red-brown layer at (a) 458, (b) 514, (c) 532, and (d) 633 nm excitation wavelength in the range of 100–300  $\text{cm}^{-1}$ , respectively.

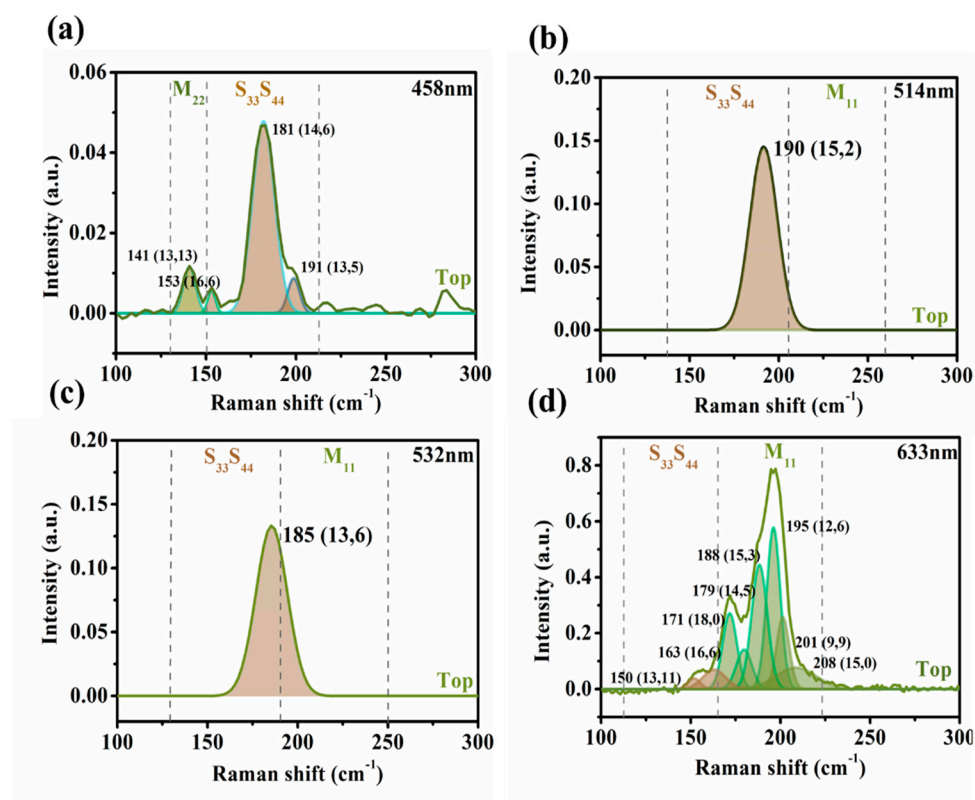

Figure S15. Gaussian fitting curves for the top green layer at (a) 458, (b) 514, (c) 532, and (d) 633 nm excitation wavelength in the range of 100–300  $\text{cm}^{-1}$ , respectively.

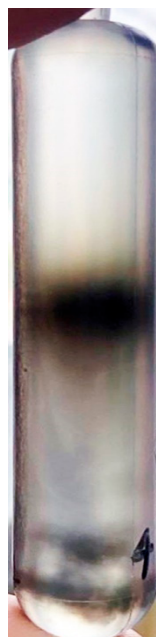

**Figure S16.** DGU separation of the co-surfactants (Ua-PMS and SDS) dispersed SWNTs.

## 2. Tables

**Table S1.** The performance features of DGU separation of SWNTs

| Separation type | Medium    | Surfactant         | Enrichment                                                      | Ref.      |
|-----------------|-----------|--------------------|-----------------------------------------------------------------|-----------|
| m/sc            | Iodixanol | SC, DOC, and STDOC | 97% sc-SWNTs                                                    | [51]      |
| m/sc, d         | Iodixanol | SC, SDS            | 99% pure semiconducting CNTs with narrow diameter distributions | [60]      |
| m/sc, (n,m)     | Iodixanol | SC, SDS            | Enantiomers of different SWNTs chiralities                      | [61]      |
| m/sc            | Sucrose   | SC                 | 95% sc-SWNTs, 69% m-SWNTs                                       | [62]      |
| (n,m)           | Iodixanol | N-CS, SDS          | SWNTs of different chirality                                    | [46]      |
| m/sc            | Iodixanol | Pluronic, Tetronic | 99% sc-SWNTs, 74% m-SWNTs                                       | [52]      |
| m/sc            | Iodixanol | Pluronic           | 99% sc-SWNTs, 99% m-SWNTs                                       | [63]      |
| m/sc            | Sucrose   | BA-PMS, SDS        | 86.5% m-SWNTs, 99% sc-SWNTs                                     | This Work |

**Table S2.** Information on the chiral indices (n,m) designation of the absorption peaks in Figure S8.

| Absorption peaks<br>(nm) | Interband transitions | Calculated diameters<br>(nm) | Chiral indices (n,m) |
|--------------------------|-----------------------|------------------------------|----------------------|
| 418                      | S33                   | 1.129                        | (12,4)               |
| 859                      | S22                   |                              | (12,4)               |
| 437                      | S33                   |                              | (11,6)               |
| 902                      | S22                   | 1.169                        | (11,6)               |
| 621                      | M11                   | 1.22                         | (9,9)                |
| 463                      | S33                   | 1.223                        | (10,8)               |
| 942                      | S22                   | 1.23                         | (14,3)               |
| 973                      | S22                   | 1.26                         | (13,5)               |
| 488                      | S33                   |                              | (13,5)               |
| 647                      | M11                   | 1.308                        | (15,3)               |
| 1011                     | S22                   | 1.331                        | (17,0)               |
| 668                      | M11                   | 1.336                        | (14,5)               |
| 692                      | M11                   | 1.376                        | (13,7)               |
| 518                      | S33                   | 1.392                        | (14,6)               |
| 1072                     | S22                   |                              | (14,6)               |
| 701                      | M11                   | 1.409                        | (18,0)               |
| 737                      | M11                   | 1.467                        | (15,6)               |
| 551                      | S33                   | 1.487                        | (16,5)               |
| 1147                     | S22                   | 1.542                        | (16,6)               |
| 584                      | S33                   |                              | (16,6)               |

**Table S3.** Summary of Raman chiral assignment information of BA-PMS dispersed SWNTs and top green and bottom brown layers at 458, 514, 532, and 633 nm excitation wavelengths.

| Before DGU *                     |                        |                       |                       |                       |                       |
|----------------------------------|------------------------|-----------------------|-----------------------|-----------------------|-----------------------|
| 458 nm                           | 147(19,4)<br>dt=1.663  | 159(16,6)<br>dt=1.542 | 172(14,6)<br>dt=1.392 | 188(17,0)<br>dt=1.331 | 197(13,5)<br>dt=1.260 |
| 514 nm                           | 162(18,1)<br>dt=1.450  | 179(14,6)<br>dt=1.392 | 191(15,2)<br>dt=1.260 |                       |                       |
| 532 nm                           | 182(13,6)<br>dt=1.317  |                       |                       |                       |                       |
| 633 nm                           | 149(15,10)<br>dt=1.706 | 166(16,6)<br>dt=1.542 | 177(14,5)<br>dt=1.336 | 191(15,3)<br>dt=1.308 | 210(14,2)<br>dt=1.182 |
| After DGU (Top green layer) *    |                        |                       |                       |                       |                       |
| 458 nm                           | 141(13,13)<br>dt=1.777 | 153(16,6)<br>dt=1.542 | 181(14,6)<br>dt=1.392 | 191(13,5)<br>dt=1.260 |                       |
| 514 nm                           | 190(15,2)<br>dt=1.260  |                       |                       |                       |                       |
| 532 nm                           | 185(13,6)<br>dt=1.317  |                       |                       |                       |                       |
| 633 nm                           | 150(13,11)<br>dt=1.629 | 163(16,6)<br>dt=1.542 | 171(18,0)<br>dt=1.409 | 179(14,5)<br>dt=1.336 | 188(15,3)<br>dt=1.308 |
|                                  | 195(12,6)<br>dt=1.243  | 201(9,9) 1.220        | 208(15,0)<br>dt=1.174 |                       |                       |
| After DGU (Bottom brown layer) * |                        |                       |                       |                       |                       |
| 458 nm                           | 162(13,9)<br>dt=1.500  | 175(14,6)<br>dt=1.392 | 189(17,0)<br>dt=1.331 | 198(13,5)<br>dt=1.260 |                       |
| 514 nm                           | 177(14,6)<br>dt=1.392  |                       |                       |                       |                       |
| 532 nm                           | 185(13,6)<br>dt=1.317  |                       |                       |                       |                       |
| 633 nm                           | 141(19,5)<br>dt=1.717  | 154(15,8)<br>dt=1.583 | 188(15,3)<br>dt=1.308 | 201(9,9)<br>dt=1.220  |                       |

\* Brown is sc-SWNTs; Green is m-SWNTs; dt (nm) is the diameter of SWNTs.

### 3. The Recovery Yields of m- and sc-SWNTs

In addition to this, the recovery yields of m- and sc-SWNTs could be estimated by the absorbance and volume of SWNTs dispersion before and after DGU separation. According to Beers law ( $A = \epsilon lc$ ), the absorbance ( $A$ ) of SWNTs is directly proportional to their concentration ( $c$ ) under the same extinction coefficient ( $\epsilon$ ) and path length ( $l$ ). Thus, the ratio of absorbance equals to that of concentration for m- or sc-SWNTs. Considering the volumes of SWNTs dispersion before and after DGU separation, the recovery yields of m- and sc-SWNTs could be extracted by

$$\eta_m = \frac{A_m * V_m}{A_1 * V} * 100\% \quad \text{or} \quad \eta_{sc} = \frac{A_{sc} * V_{sc}}{A_2 * V} * 100\%$$

where,  $A_1$  or  $A_2$  is the maximum absorbance of m- or sc-SWNTs before DGU separation.  $A_m$  and  $V_m$  ( $A_{sc}$  and  $V_{sc}$ ) are the maximum absorbance and volume of the m-SWNTs (sc-SWNTs) dispersion after DGU separation.  $V$  is the volume of the SWNTs dispersion before DGU separation. Based on the data shown in Figure S9, the recovery yields of m- and sc-SWNTs were estimated to be 4.6% and 1.8%, respectively.
